# Supplementary material
Source: PubMed Central journal article supplement (PMC7263057)
Supplement: NIHMS1591164-supplement-Supplementary_materials.pdf [file NIHMS1591164-supplement-Supplementary_materials.pdf]

# **Mechanistic Differences in Cell Death Responses to Metal-based Engineered Nanomaterials in Kupffer Cells and Hepatocytes**

*Xiang Wang,<sup>†, ‡</sup> Chong Hyun Chang,<sup>‡</sup> Jinhong Jiang,<sup>‡</sup> Xiangsheng Liu,<sup>†</sup> Jiulong Li,<sup>†</sup> Qi Liu,<sup>†</sup> Yu-Pei Liao,<sup>†</sup> Linjiang Li,<sup>‡</sup> André E. Nel<sup>†, ‡, \*</sup> and Tian Xia,<sup>†, ‡, \*</sup>*

<sup>†</sup>Division of NanoMedicine, Department of Medicine; <sup>‡</sup>California NanoSystems Institute; University of California, Los Angeles, CA 90095, United States, United States

**\*Corresponding Authors:** André E. Nel, M.D./Ph.D., Tian Xia, M.D./Ph.D.,

Department of Medicine, Division of NanoMedicine, UCLA School of Medicine, 52-175 CHS, 10833 Le Conte Ave, Los Angeles, CA 90095-1680.

E-mail: anel@mednet.ucla.edu, txia@ucla.edu

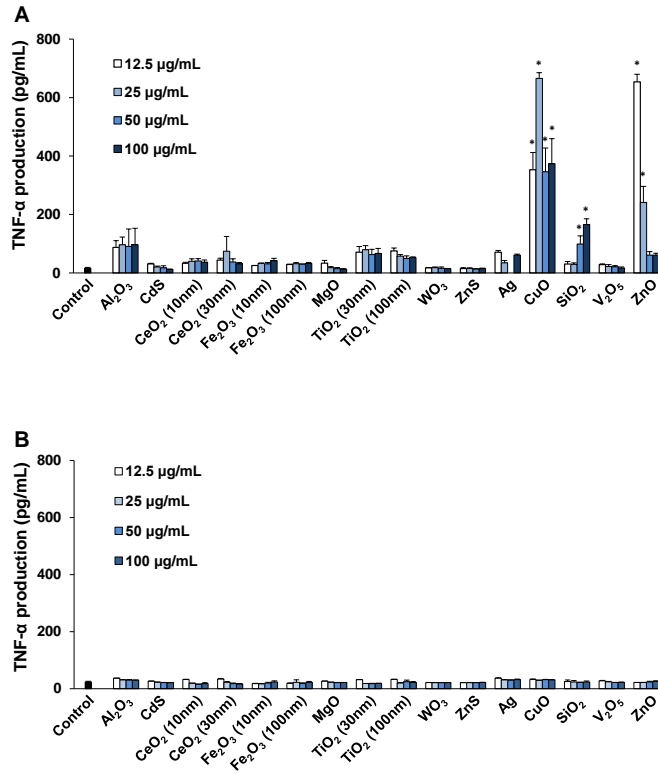

**Figure S1. Assessment of nanoparticles induction of TNF- $\alpha$  release in KUP5 and Hepa 1-6 cells.** (A) Dose-dependent TNF- $\alpha$  release by (A) KUP5 and (B) Hepa 1–6 cells after exposure to nanoparticles for 24 h over a dose range of 12.5–100  $\mu$ g/mL. Supernatants were collected to measure TNF- $\alpha$  production by ELISA. \* $p < 0.05$  compared to control cells.

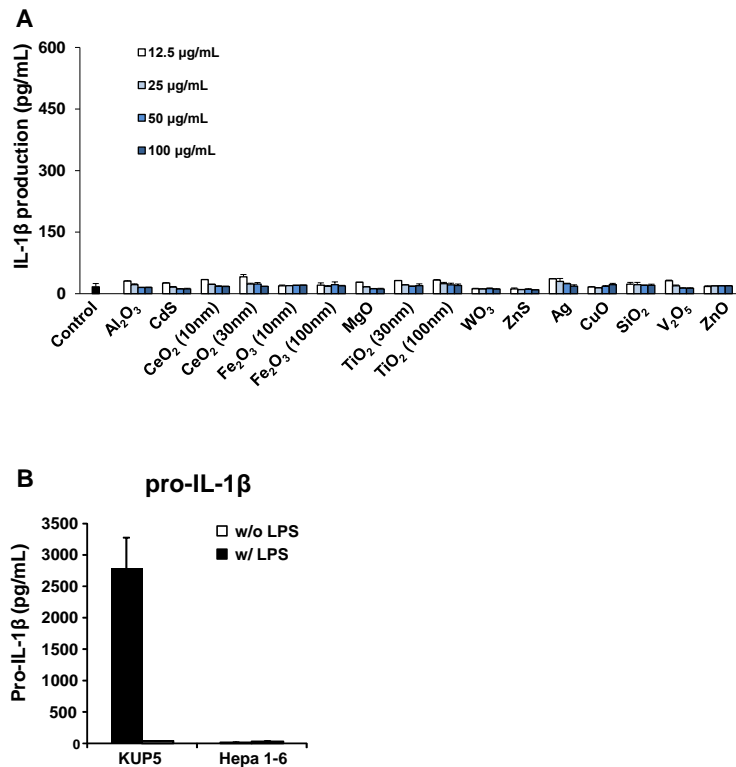

**Figure S2. Assessment of IL-1 $\beta$  levels in Hepa 1-6 cells and pro-IL-1 $\beta$  level in KUP5 and Hepa 1-6 cells.** (A) KUP5 and Hepa 1–6 cells were treated with 1  $\mu$ g/mL of LPS for 4 h. Cells were lysed to release intracellular proteins. Pro-IL-1 $\beta$  levels were quantified by ELISA; (B) Dose-dependent IL-1 $\beta$  release by 16 NPs in Hepa 1–6 cells. Hepa 1–6 cells were exposed to NPs (12.5–100  $\mu$ g/mL) for 24 h. Supernatants were collected to measure IL-1 $\beta$  production by ELISA; \*p < 0.05 compared to control cells.

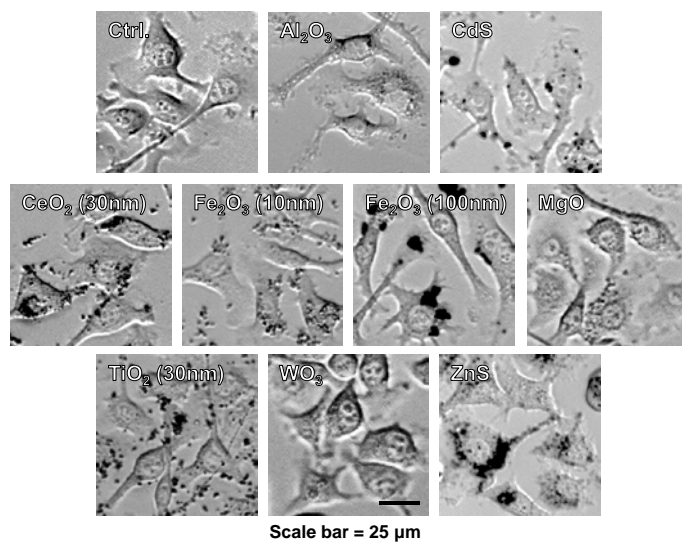

**Figure S3. Optical microscopy images of NP-treated KUP5 cells.** Optical microscopy images showing the morphology of KUP5 cells exposed to the other eleven NPs in addition to the seven in Figure 4A at 12.5 μg/mL for 6 h. The scale bar is 25 μm.

### Assessment of caspase 1 activation in NP-treated Hepa1-6 cells

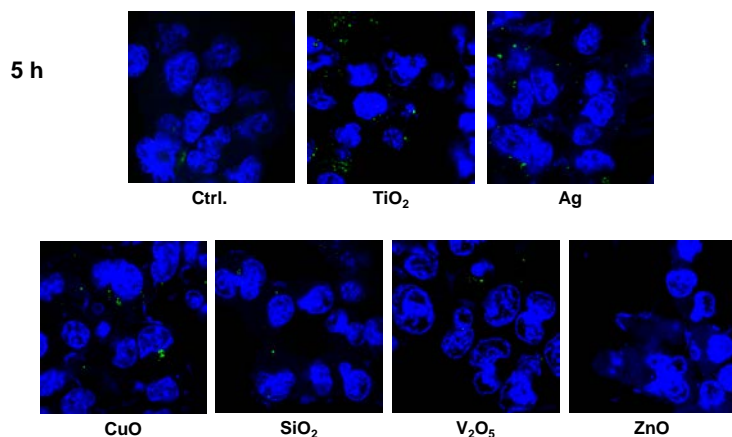

**Figure S4. Assessment of caspase 1 activation in NP-treated Hepa 1–6 cells.** Hepa 1–6 cells were incubated with nanoparticles at 25  $\mu\text{g}/\text{mL}$  for 5 h. Cells were washed with PBS and stained with FAM-FLICA Caspase-1 substrate for 1 h at 37  $^{\circ}\text{C}$  following the manufacturer’s procedure. Cells were then stained with Hoechst 33342.

Assessment of cathepsin B release and lysosomal damage in NP-treated KUP5 cells

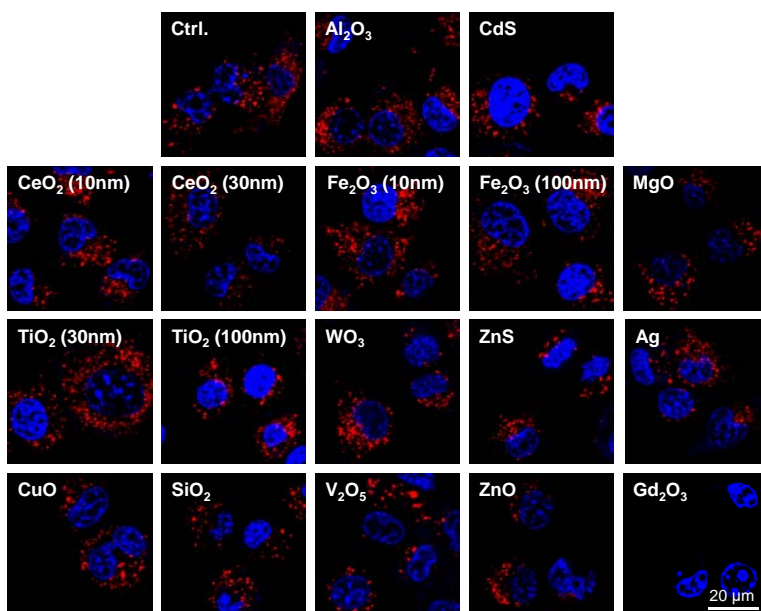

**Figure S5. Confocal microscopy to assess lysosome damage in KUP5.** LPS-primed (1 μg/mL, 4 h) KUP5 cells were exposed to 25 μg/mL of nanoparticles for 3 h. Cells were stained with Magic Red-labeled cathepsin B substrate for 30 min as well as Hoechst 33342 to reveal nuclear localization. Confocal images were acquired with a Confocal SP8-SMD microscope using DAPI and Magic Red filters. The scale bar is 20 μm. Gd<sub>2</sub>O<sub>3</sub> NPs was used as a positive control.

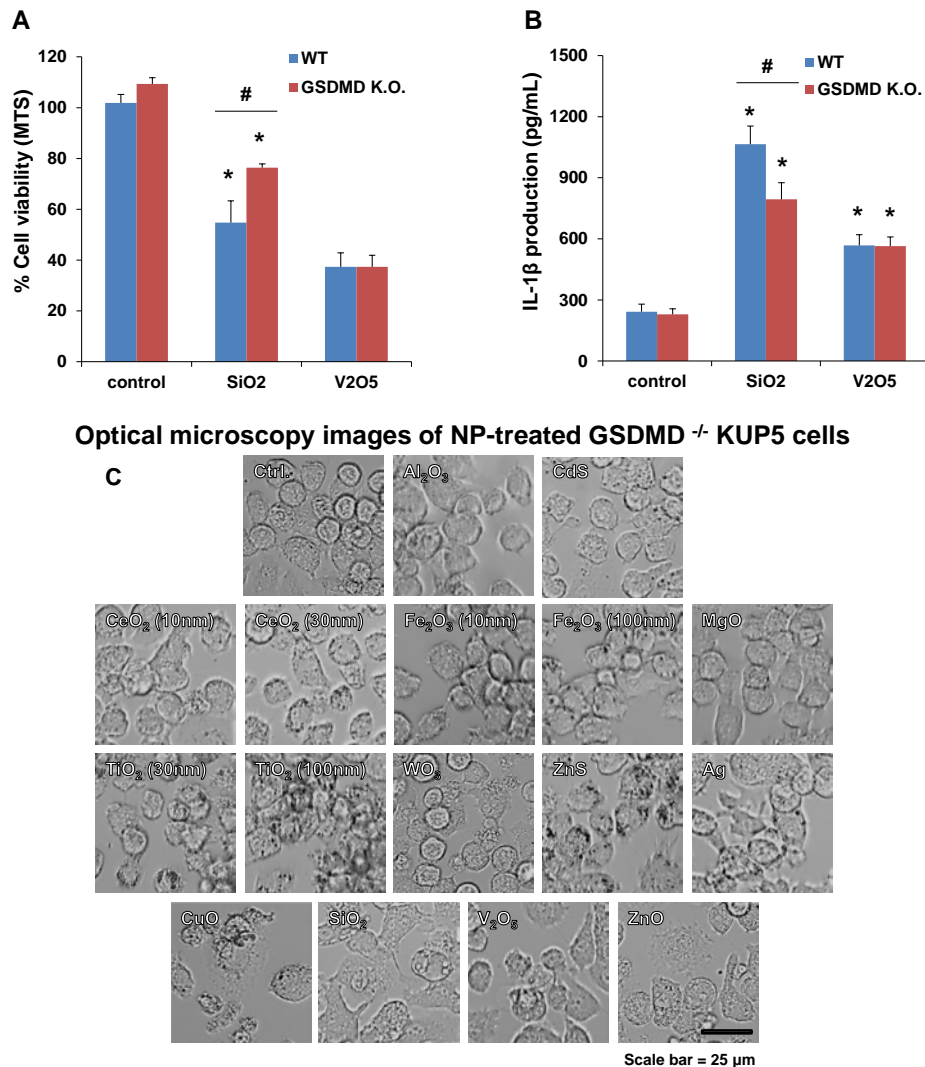

**Figure S6. Comparison of the NP-induced IL-1 $\beta$  release in wildtype and GSDMD<sup>-/-</sup> KUP5 cells.** (A) Cell viability screening of wildtype and GSDMD<sup>-/-</sup> KUP5 exposed to SiO<sub>2</sub> and V<sub>2</sub>O<sub>5</sub> NPs. Use of MTS assay to assess the viability of LPS-primed (1  $\mu$ g/mL for 4 h) wildtype and GSDMD<sup>-/-</sup> KUP5 cells post-exposed to 50  $\mu$ g/mL of the NPs for 18 h. The viability of nontreated control cells was regarded as 100%; (B) IL-1 $\beta$  release by SiO<sub>2</sub> and V<sub>2</sub>O<sub>5</sub> NPs in wildtype and GSDMD<sup>-/-</sup> KUP5 cells. LPS-primed (1  $\mu$ g/mL for 4 h) KUP5 cells were exposed to nanoparticles at 50  $\mu$ g/mL for 24 h. Supernatants were collected to measure IL-1 $\beta$  production by ELISA. \* $p$  < 0.05 compared to control cells; # $p$  < 0.05 between wildtype and GSDMD<sup>-/-</sup> KUP5 cells; (C) Optical microscopy images showing the morphology of GSDMD<sup>-/-</sup> cells exposed to the 16 NPs (12.5  $\mu$ g/mL) for 6 h. The scale bar is 25  $\mu$ m.

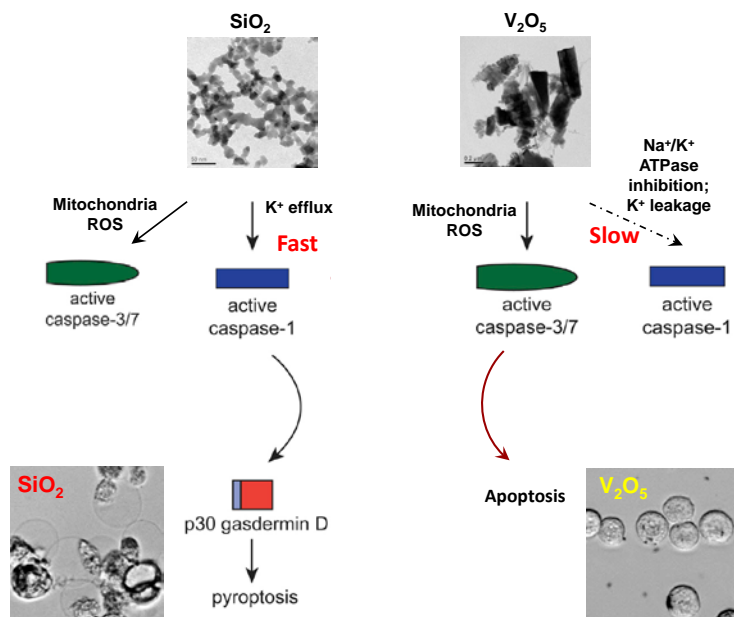

**Figure S7. A schematic to explain contrasting mechanisms in cell death between  $\text{SiO}_2$  and  $\text{V}_2\text{O}_5$  NPs in KUP5 cells.**



## Supporting Experimental Section

**Determination of TNF- $\alpha$  Production:** KUP5 and Hepa 1–6 cells in 100  $\mu$ L of tissue culture medium were plated overnight at a density of  $2 \times 10^4$  cells per well in a 96-well plate. The cells were primed by replacing the tissue culture medium with fresh medium containing 1  $\mu$ g/mL LPS to treat for 4 h. The primed cells were exposed to nanoparticles at the indicated concentrations and time periods as shown in each figure legend. The cellular supernatants were collected for TNF- $\alpha$  quantification by enzyme-linked immunosorbent assay (ELISA) according to the manufacturer's instructions.

**Determination of Pro-IL-1 $\beta$  Activity in LPS-Primed Cells:** Hepa 1–6 cells were plated overnight in 96-well plates at  $2 \times 10^4$  cells per well. Following priming of the cells with 1  $\mu$ g/mL LPS for 4 h, cells were lysed by using three freeze–thaw cycles in 100  $\mu$ L of lysis buffer (10  $\mu$ M 2-ME, 9 mM MgCl<sub>2</sub>, and 0.1% triton X-100 in PBS). The cellular lysates were obtained after centrifugation and used for the quantification of pro-IL-1 $\beta$  by an ELISA (Thermo Fisher Scientific).

**Determination of Caspases 1 Activity by Confocal Microscopy:** Hepa 1-6 cells were cultured in an 8-well Lab-Tek chamber slide at  $5 \times 10^4$  cells/400  $\mu$ L medium at 37 °C and 5% CO<sub>2</sub>. The cells were incubated with nanoparticles at 50  $\mu$ g/mL for 3 h. The treated cells were washed with PBS and stained with FAM-FLICA Caspase-1 or Caspase 3/7 substrates for 1 h at 37 °C following the manufacturer's procedure. Finally, the cells were fixed with 4 % paraformaldehyde in PBS, stained with Hoechst 33342 (5  $\mu$ g/mL), and imaged using Leica Confocal SP8-SMD microscope.

**Assessment of Lysosomal Damage by Cathepsin B Staining:** After KUP5 cells were cultured overnight in an 8-well Lab-Tek chamber slide at  $5 \times 10^4$  cells per well, the cells were primed with LPS (1  $\mu$ g/mL) for 4 h and exposed to particles (50  $\mu$ g/mL) for 1 h at 37 °C. The cells were washed with PBS and incubated with Magic Red working solution for 30 min at 37 °C. Cells were washed with PBS and fixed with 4% paraformaldehyde in PBS. Finally, the cells were stained with Hoechst 33342 (5  $\mu$ g/mL), washed with PBS, and imaged under a Leica Confocal SP8-SMD microscope.

***siRNA Knockdown in KUP5 Cells:*** Knockdown of GSDMD gene was performed in KUP5 cells using electroporation at the Integrated Molecular Technologies Core Facility (University of California, Los Angeles). Briefly, 6  $\mu\text{g}$  of siRNA in 100  $\mu\text{L}$  of media was electroporated into  $1 \times 10^6$  KUP5 cells. After electroporation, cells were maintained in complete media for another 48 h before cytotoxicity and IL-1 $\beta$  production analysis.

***Assessment of Pyroptotic Cell Death under Optical Microscopy:*** Optical microscopy was used to monitor the morphology of GSDMD knockdown KUP5 cells, pretreated with 1  $\mu\text{g}/\text{mL}$  LPS for 4 h, during exposure to 12.5  $\mu\text{g}/\text{mL}$  nanoparticles for 6 h at 37  $^\circ\text{C}$  and 5%  $\text{CO}_2$  in an 8-well Lab-Tek chamber slide. The cells were examined using a Zeiss Optical Microscope. In order to monitor the time kinetics of the pyroptosis event in LPS pretreated cells,  $10 \times 10^4$  KUP5 cells/mL were exposed to 50  $\mu\text{g}/\text{mL}$  nanoparticles for 6 h in a 35 mm glass bottom dish (In Vitro Scientific) at 37  $^\circ\text{C}$  and 5%  $\text{CO}_2$ . Light optic images were obtained using a Leica Confocal SP5 Blue microscope.

***Assessment of Nanoparticle Cytotoxicity:*** The viability of KUP5 cells was assessed by the MTS assay. Cells were exposed to  $\text{V}_2\text{O}_5$  nanoparticles and  $\text{V}^{5+}$  ions at the indicated concentrations for 18 h in a 96-well plate, followed by removal of the medium and replacement with 120  $\mu\text{L}$  of complete cell culture media containing 16.7% of an MTS stock solution for 0.5 h at 37  $^\circ\text{C}$ . The plates were centrifuged at 2000g for 10 min in an Eppendorf 5430 microcentrifuge, and then 100  $\mu\text{L}$  of supernatant was collected from each well and transferred into a new 96-well plate. The absorbance was read at 490 nm on a SpectraMax M5e microplate reader (Molecular Devices, Sunnyvale, CA).
